# Supplementary material for: Less is more: On‐board lossy compression of accelerometer data increases biologging capacity
Source: PubMed Central journal article supplement — J Anim Ecol. 2020 Jan 13;89(1):237–47. doi: 10.1111/1365-2656.13164 (PMC7004173; doi:10.1111/1365-2656.13164), 2020-01-13
Supplement: JANE-89-237-s002.pdf [file JANE-89-237-s002.pdf]

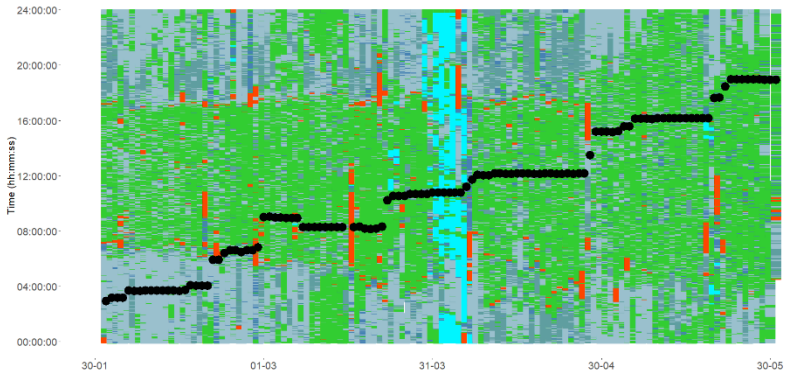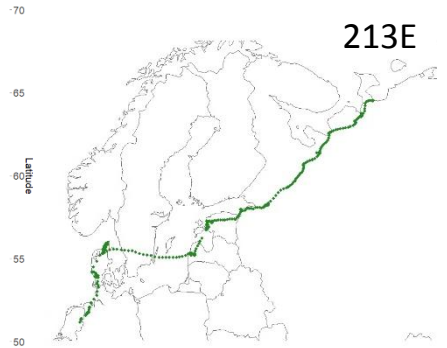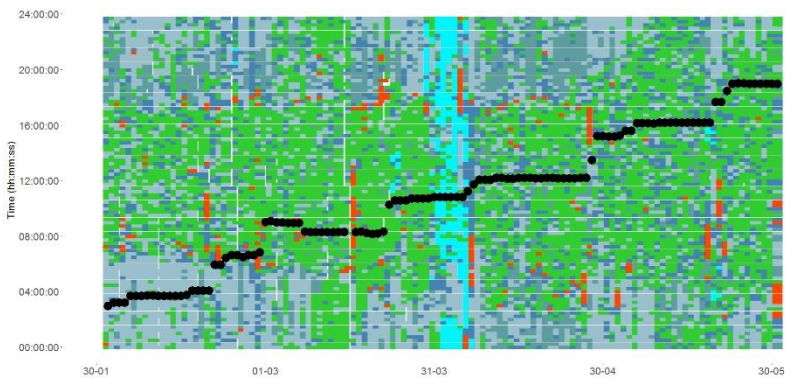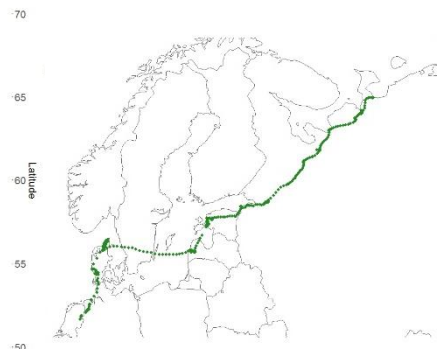

aq.foraging fly relax sleep swim t.foraging

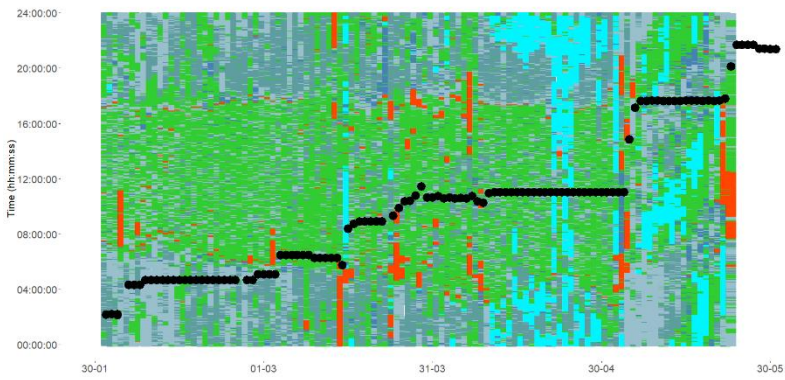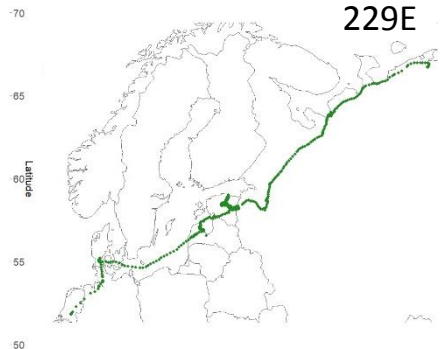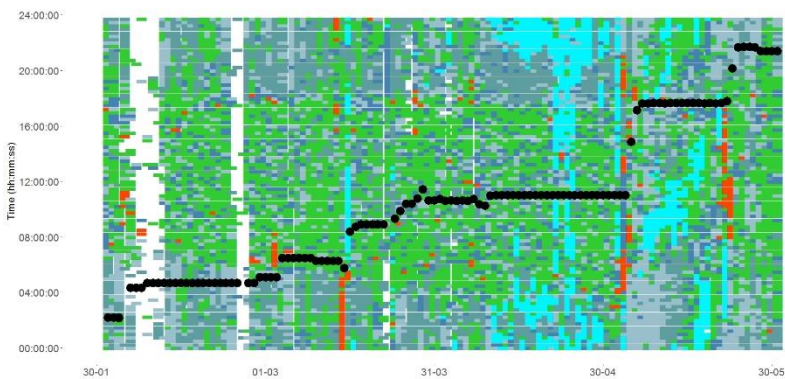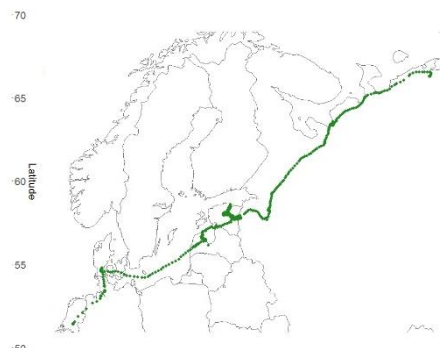

aq.foraging fly relax sleep swim t.foraging

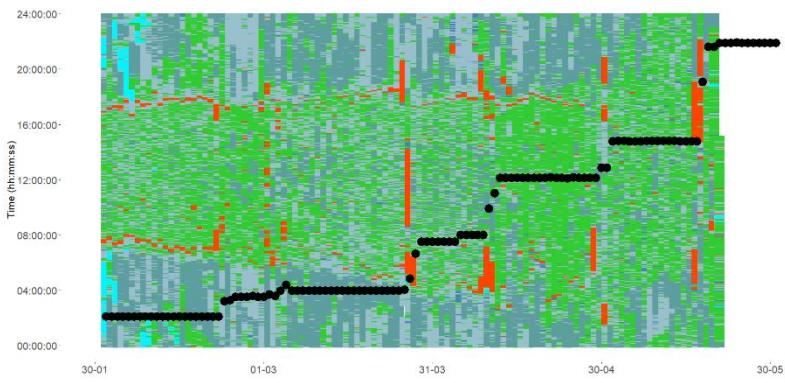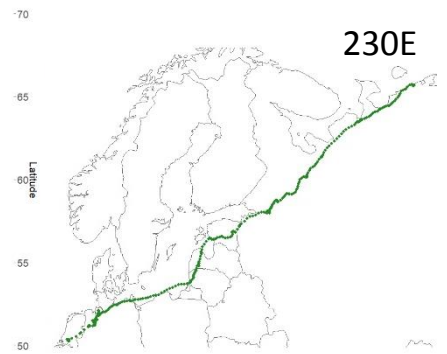

230E

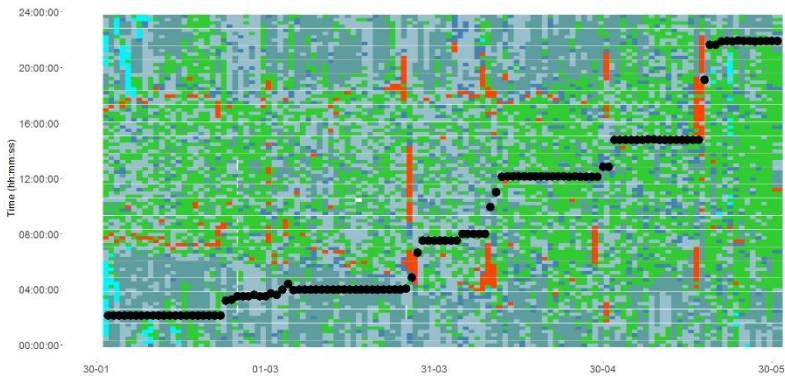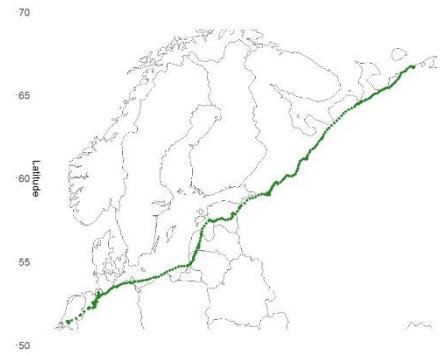

aq.foraging fly relax sleep swim t.foraging

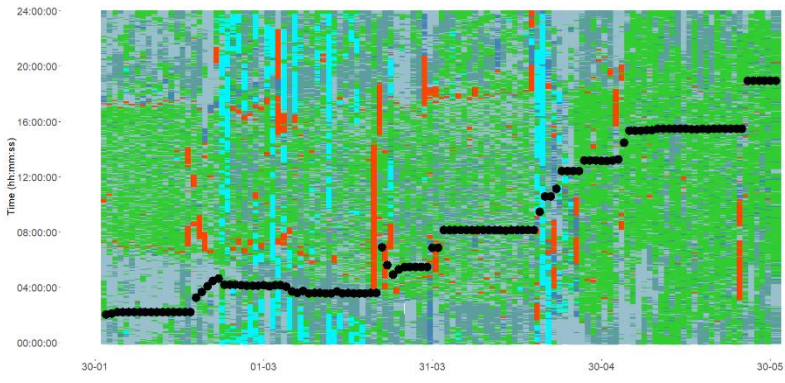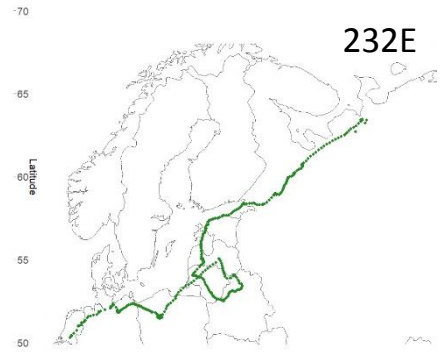

232E

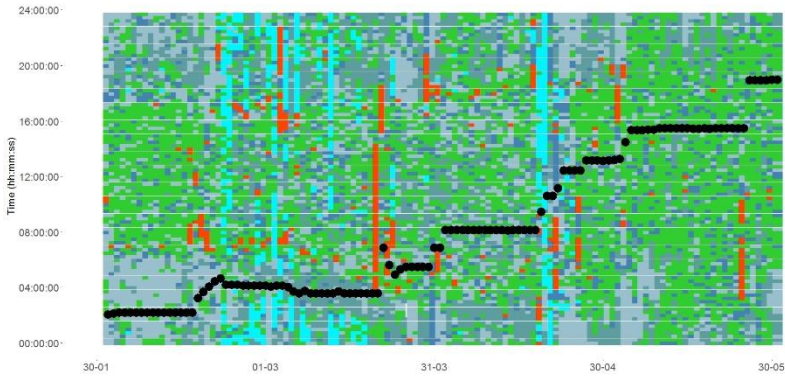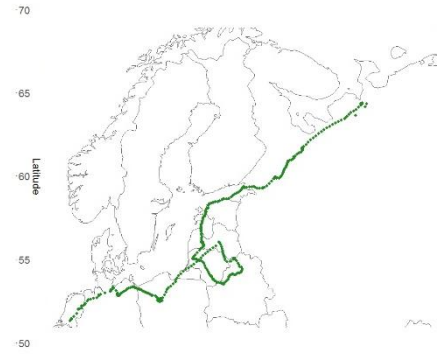

aq.foraging fly relax sleep swim t.foraging

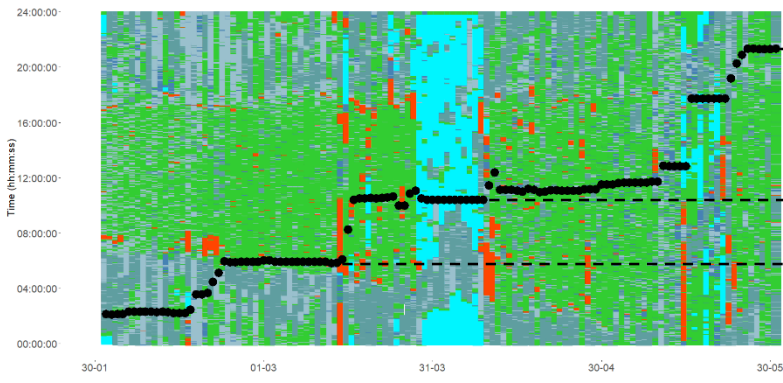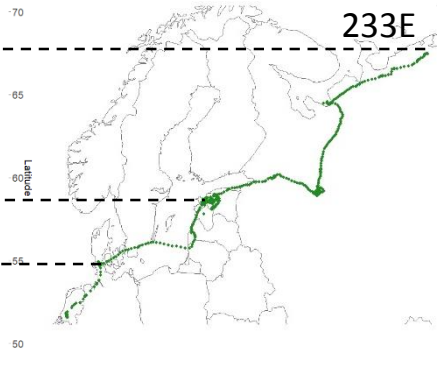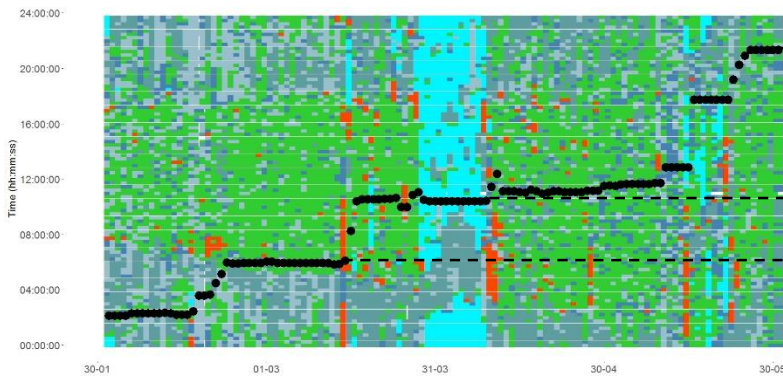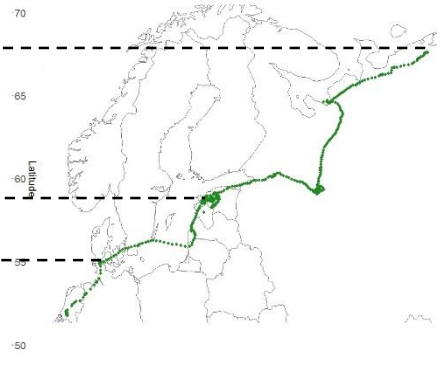

■ aq.foraging 
 ■ fly 
 ■ relax 
 ■ sleep 
 ■ swim 
 ■ t.foraging

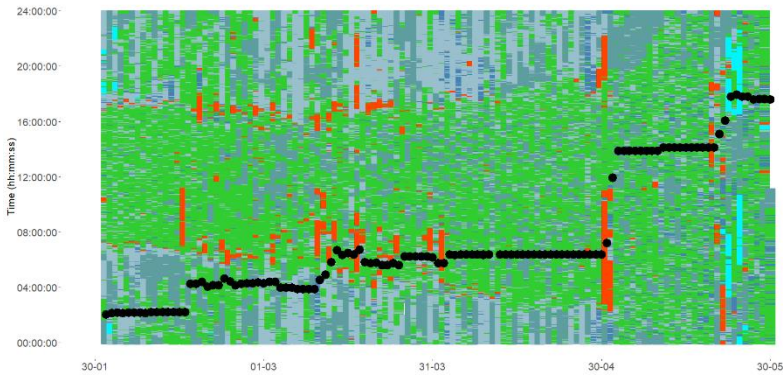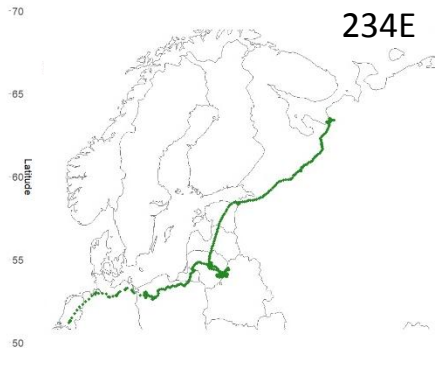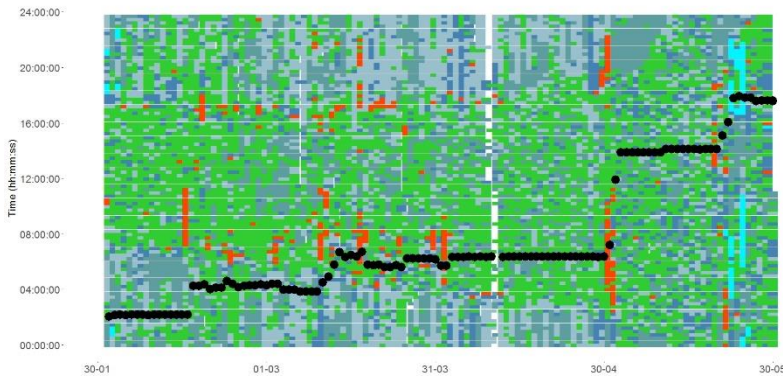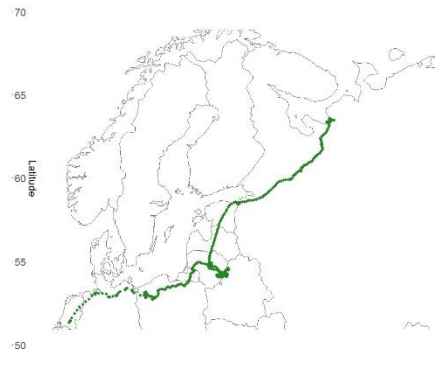

■ aq.foraging 
 ■ fly 
 ■ relax 
 ■ sleep 
 ■ swim 
 ■ t.foraging

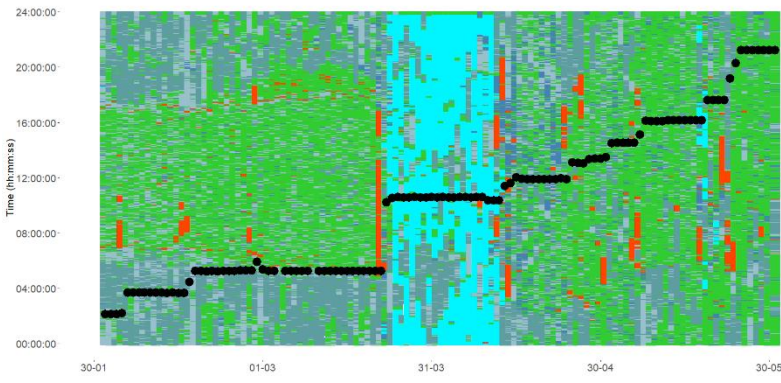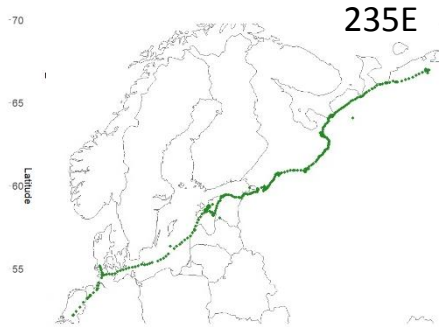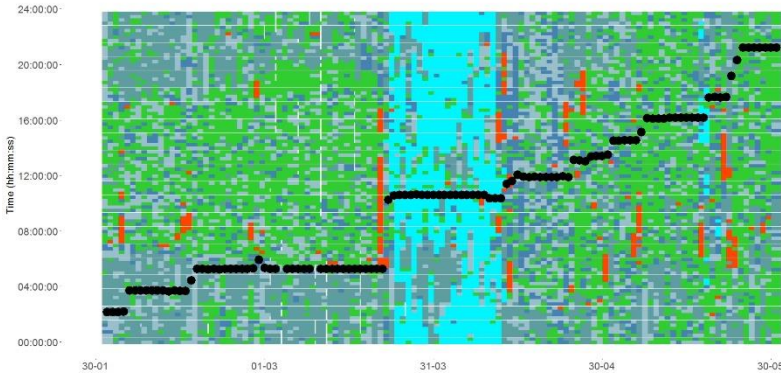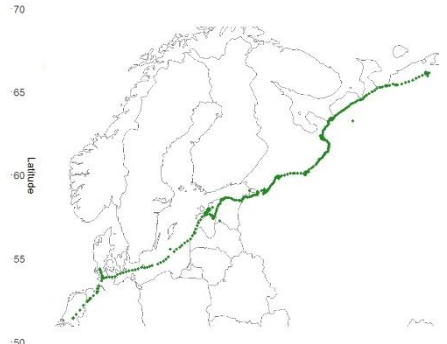

■ aq.foraging   
 ■ fly   
 ■ relax   
 ■ sleep   
 ■ swim   
 ■ t.foraging

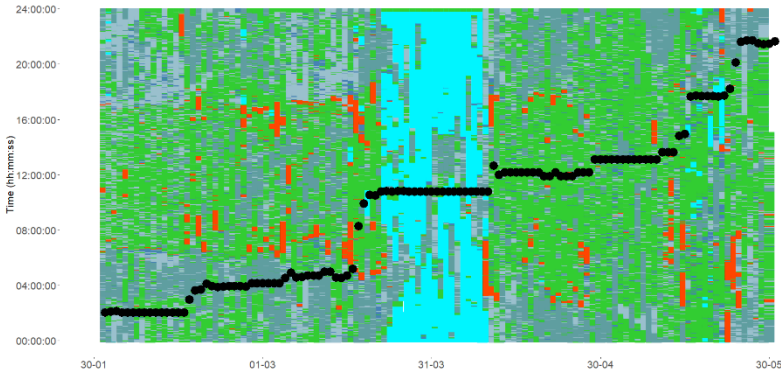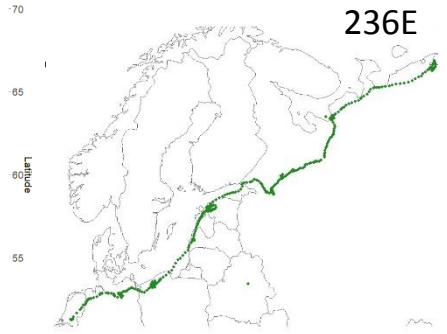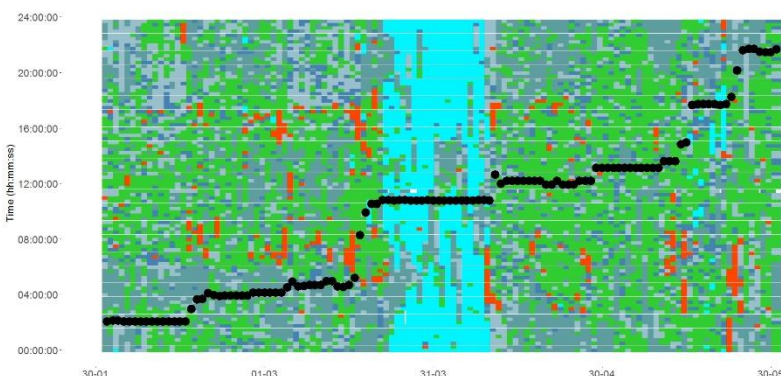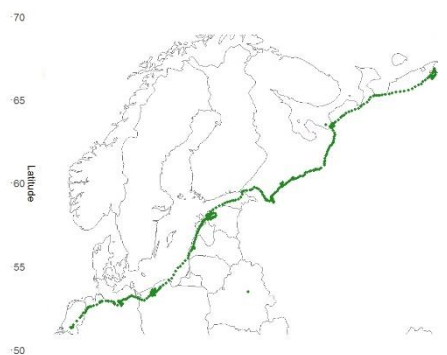

■ aq.foraging   
 ■ fly   
 ■ relax   
 ■ sleep   
 ■ swim   
 ■ t.foraging

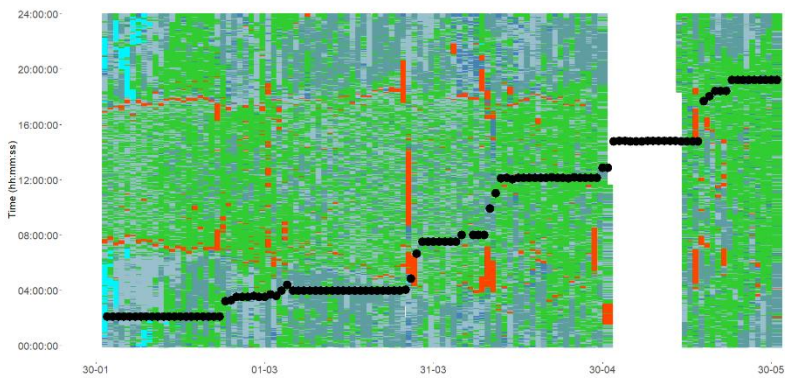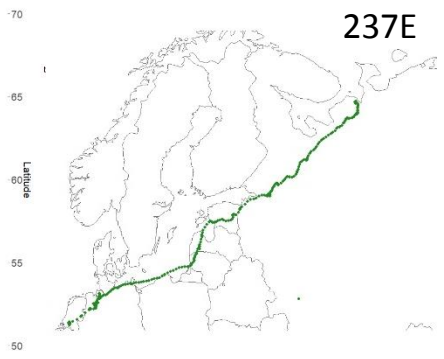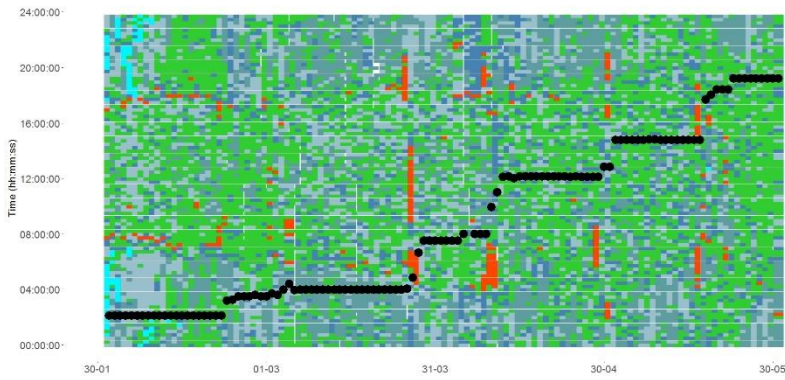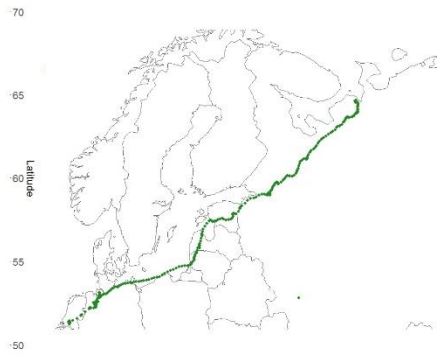

aq. foraging fly relax sleep swim t. foraging

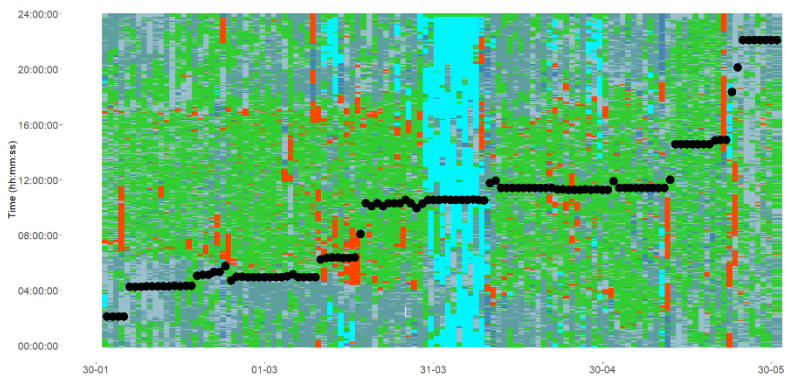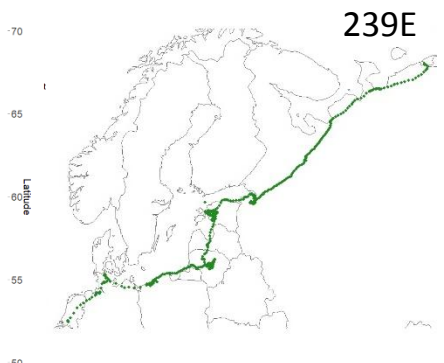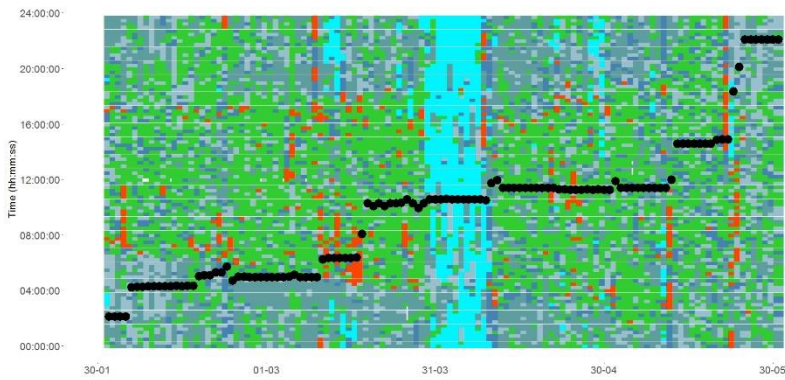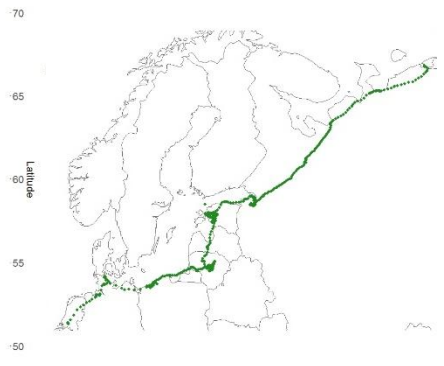

aq. foraging fly relax sleep swim t. foraging
